# Supplementary material for: Networks Models of Actin Dynamics during Spermatozoa Postejaculatory Life: A Comparison among Human-Made and Text Mining-Based Models
Source: Biomed Res Int. 2016 Aug 24;2016:9795409. doi: 10.1155/2016/9795409 (PMC5013236; doi:10.1155/2016/9795409)
Supplement: Supplementary file 1 — Here are listed the publications that result from our PubMed search and those find by ALS. [file 9795409.f1.xlsx]

## Sheet: Foglio1
Papers used to realize HM_SAN	Common papers	Papers identified by ALS
PKA-dependent phosphorylation of LIMK1 and cofilin is essential for mouse sperm acrosomal exocytosis.	PKA-dependent phosphorylation of LIMK1 and cofilin is essential for mouse sperm acrosomal exocytosis.	Role of TRPV1 channels in boar spermatozoa acquisition of fertilizing ability. (2010)
Mammalian sperm phosphodiesterases and their involvement in receptor-mediated cell signaling important for capacitation		p-FAK-Tyr(397) regulates spermatid adhesion in the rat testis via its effects on F-actin organization at the ectoplasmic specialization.
Src family tyrosine kinase regulates acrosome reaction but not motility in porcine spermatozoa.		The polymerization of actin: its role in the generation of the acrosomal process of certain echinoderm sperm.(1973)
Signaling pathways in sperm capacitation and acrosome reaction.	Signaling pathways in sperm capacitation and acrosome reaction.	Kinetics of the interaction of a 41-kilodalton macrophage capping protein with actin: promotion of nucleation during prolongation of the lag period. (1990)
Oxidative stress impairs function and increases redox protein modifications in human spermatozoa,		Analysis of CAPZA3 localization reveals temporally discrete events during the acrosome reaction. (2010)
The macaque sperm actin cytoskeleton reorganizes in response to osmotic stress and contributes to morphological defects and decreased motility		Solution structure of the motile major sperm protein (MSP) of Ascaris suum - evidence for two manganese binding sites and the possible role of divalent cations in filament formation. (1998)
Crosstalk between protein kinase A and C regulates phospholipase D and F-actin formation during sperm capacitation,	Crosstalk between protein kinase A and C regulates phospholipase D and F-actin formation during sperm capacitation,	Subcellular and regional location of "brain" proteins BASP1 and MARCKS in kidney and testis. (2011)
Mechanism of sperm capacitation and the acrosome reaction: role of protein kinases,		Purification and characterization of a 190-kD microtubule-associated protein from bovine adrenal cortex. (1986)
Remodeling of the actin cytoskeleton during mammalian sperm capacitation and acrosome reaction,		Focal adhesion kinase-Tyr407 and -Tyr397 exhibit antagonistic effects on blood-testis barrier dynamics in the rat. (2012)
Regulation of sperm motility by PIP2(4,5) and actin polymerization,		Continuous phosphatidylinositol metabolism is required for cleavage of crane fly spermatocytes. (2004)
Role and regulation of EGFR in actin remodeling in sperm capacitation and the acrosome reaction.	Role and regulation of EGFR in actin remodeling in sperm capacitation and the acrosome reaction.	Nematode sperm motility: nonpolar filament polymerization mediated by end-tracking motors. (2007)
Role of actin cytoskeleton in mammalian sperm capacitation and the acrosome reaction.		Decondensation of human spermatozoal chromatin by nuclear actin polymerization. (1984)
Reguation of sperm capacitation and the acrosome reaction by PIP2 and action modulation.	Reguation of sperm capacitation and the acrosome reaction by PIP2 and action modulation.	Contractile apparatus of the normal and abortive cytokinetic cells during mouse male meiosis.(2000)
Role and regulation of sperm gelsolin prior tu fertilization.	Role and regulation of sperm gelsolin prior tu fertilization.	The acrosome reaction in human spermatozoa. (2000)
Regulation of the sperm EGF receptor by ouabain leads to initation of the acrosome reaction.		Three different calcium wave pacemakers in ascidian eggs. (2001)
The role and importance of cofilin in human sperm capacitation and the acrosome reaction.		Phospholipase C and myosin light chain kinase inhibition define a common step in actin regulation during cytokinesis. (2007)
An important role of actin polymerization in the human zona pellucida-induced acrosome reaction.		Focal adhesion kinase is a regulator of F-actin dynamics: New insights from studies in the testis. (2013)
Role of PI3-Kinase and PI4-kinase in actin polymerization during bovine sperm capacitation.	Role of PI3-Kinase and PI4-kinase in actin polymerization during bovine sperm capacitation.	Cytosolic Ca(2+) as a multifunctional modulator is required for spermiogenesis in Ascaris suum. (2013)
The association between CDC42 and caveolin-1 is involved in the reglation of capacitation and acrosome reaction of guinea pig and mouse sperm.	The association between CDC42 and caveolin-1 is involved in the reglation of capacitation and acrosome reaction of guinea pig and mouse sperm.	Interactions of proteases, protease inhibitors, and the beta1 integrin/laminin gamma3 protein complex in the regulation of ectoplasmic specialization dynamics in the rat testis. (2004)
Identification and characterization of RHOA-interacting proteins in bovine spermatozoa.	Identification and characterization of RHOA-interacting proteins in bovine spermatozoa.	Protein kinases and adherens junction dynamics in the seminiferous epithelium of the rat testis. (2005)
Hyper-activated motility in sperm capacitation is mediated by phospholipase D-dependent actin polymerizaion.		Sperm incorporation in Xenopus laevis: characterisation of morphological events and the role of microfilaments. (2001)
Activation of Sperm EGFR by light irradiation is mediated by reactive oxygen species.	Activation of Sperm EGFR by light irradiation is mediated by reactive oxygen species.	Regulation of Sertoli-germ cell adherens junction dynamics in the testis via the nitric oxide synthase (NOS)/cGMP/protein kinase G (PRKG)/beta-catenin (CATNB) signaling pathway: an in vitro and in vivo study. (2005)
The role of actin in capacitation-related signaling and in silico and in vitro study.		RAB13 participates in ectoplasmic specialization dynamics in the rat testis. (2009)
The role of ezrin-associated protein network in human sperm capacitation.	The role of ezrin-associated protein network in human sperm capacitation.	Intercellular adhesion molecule-2 is involved in apical ectoplasmic specialization dynamics during spermatogenesis in the rat. (2013)
Actin-related protein 2/3 complex-based actin polymerization is critical for male fertility.		Zyxin, axin, and Wiskott-Aldrich syndrome protein are adaptors that link the cadherin/catenin protein complex to the cytoskeleton at adherens junctions in the seminiferous epithelium of the rat testis. (2004)
Intracellular calcium regulation in sperm capacitation and acrosomal reaction.	Intracellular calcium regulation in sperm capacitation and acrosomal reaction.	Testis-expressed profilins 3 and 4 show distinct functional characteristics and localize in the acroplaxome-manchette complex in spermatids. (2009)
		Cortical flows powered by asymmetrical contraction transport PAR proteins to establish and maintain anterior-posterior polarity in the early C. elegans embryo. (2004)
		Fascin 1 is an actin filament-bundling protein that regulates ectoplasmic specialization dynamics in the rat testis. (2014)
		Interleukin-1alpha is a regulator of the blood-testis barrier. (2011)
		rpS6 regulates blood-testis barrier dynamics through Arp3-mediated actin microfilament organization in rat sertoli cells. An in vitro study. (2015)
		Identification and characterization of a novel Rab GTPase-activating protein in spermatids. (2011)
26	12	31
